# Supplementary material for: Flexible all-solid-state ultrahigh-energy asymmetric supercapacitors based on tailored morphology of NiCoO2/Ni(OH)2/Co(OH)2electrodes
Source: Royal Society of Chemistry journal article supplement (doi:10.1039/c8ce01385c), 2018-01-01
Supplement: c8ce01385c1.pdf [file c8ce01385c1.pdf]

## Supporting information

# Flexible All-solid-state Ultrahigh-energy Asymmetric Supercapacitors Based on Tailored Morphology of NiCoO<sub>2</sub>/Ni(OH)<sub>2</sub>/Co(OH)<sub>2</sub> Electrodes

Tianfeng Qin,<sup>a</sup> Haoqian Li,<sup>a</sup> Ruoqia Ren,<sup>a</sup> Jiaxin Hao,<sup>a</sup> Yuxiang Wen,<sup>a</sup> Zilei Wang,<sup>a</sup> Juanjuan Huang,<sup>a</sup> Deyan He,<sup>a</sup> Guozhong Cao,<sup>\*a,b</sup> Shanglong Peng<sup>\*a</sup>

<sup>a</sup> Key Laboratory for Magnetism and Magnetic Materials of the Ministry of Education, School of Physical Science and Technology, Lanzhou University, Lanzhou 730000, P.R. China

<sup>b</sup> Department of Materials and Engineering, University of Washington, Seattle, Washington 98195-2120, United States

\* E-mail address: [pengshl@lzu.edu.cn](mailto:pengshl@lzu.edu.cn);

E-mail address: [gzcao@u.washington.edu](mailto:gzcao@u.washington.edu); Tel.: +1 206 616 9084

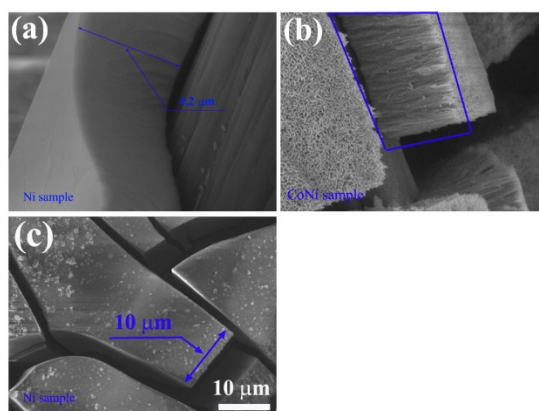

**Fig. S1** (a) High and (c) low-magnification SEM images for Ni sample. (c) Enlarged-view SEM image of CoNi sample.

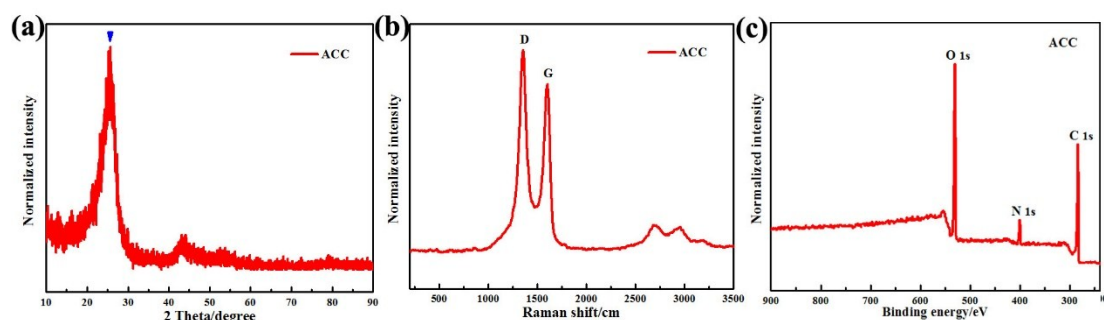

**Fig. S2** (a) XRD pattern, (b) Raman spectrum and (c) XPS curve of active carbon cloth (ACC).

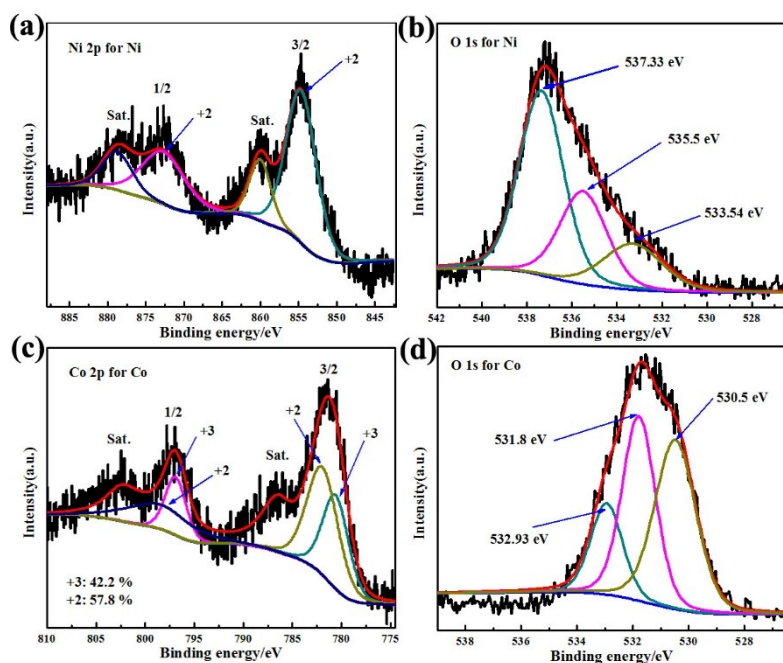

**Fig. S3** (a) Ni 2p core-level spectrum and (b) O 1s core-level spectrum of sample Ni. (c) Co 2p core-level spectrum and (d) O 1s core-level spectrum of sample Co.

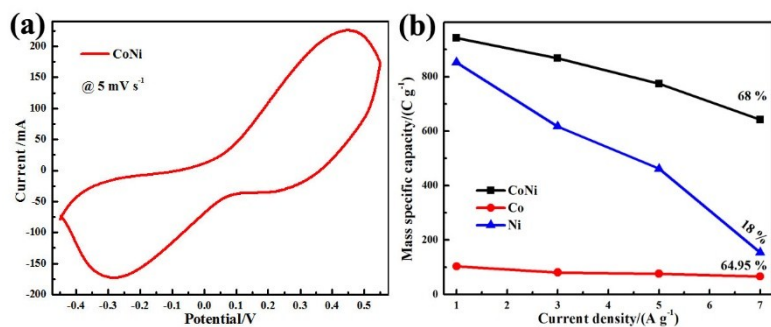

**Fig. S4** (a) CV curve of sample CoNi at  $5 \text{ mV s}^{-1}$ . (b) Mass capacitance as a function of current density of different samples. Among various electrodes, CoNi electrode shows the best rate ability of  $\sim 68\%$  compared to  $18\%$  of Ni electrode and  $\sim 65\%$  of Co electrode.

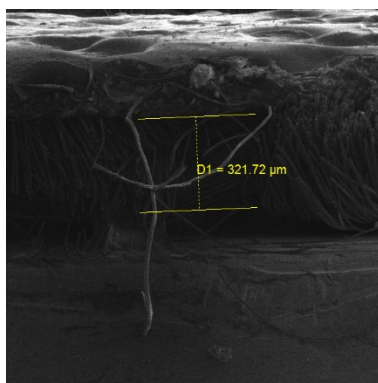

**Fig. S5** Thickness of the as-prepared electrodes.

**Table S1** Comparison of volumetric capacitance with reported literatures

| Electrode materials                                          | Volumetric capacitance/ (F cm <sup>-3</sup> ) | Reference |
|--------------------------------------------------------------|-----------------------------------------------|-----------|
| Mxene/CNT paper                                              | 435                                           | 1         |
| Graphene/porous carbon                                       | 376                                           | 2         |
| T <sub>3</sub> C <sub>2</sub> Tx paper                       | 442                                           | 3         |
| MoS <sub>2</sub> nanosheet                                   | 700                                           | 4         |
| NiCoO <sub>2</sub> /Ni(OH) <sub>2</sub> /Co(OH) <sub>2</sub> | 700                                           | This work |

**Table S2** Resistances of different samples from EIS curves

|             | R <sub>SR</sub> /Ω | R <sub>CT</sub> /Ω | Angle at low frequency/° |
|-------------|--------------------|--------------------|--------------------------|
| Co sample   | 0.78               | 0.33               | 86                       |
| Ni sample   | 0.81               | 7.53               | 22                       |
| CoNi sample | 1.02               | 0.32               | 66                       |

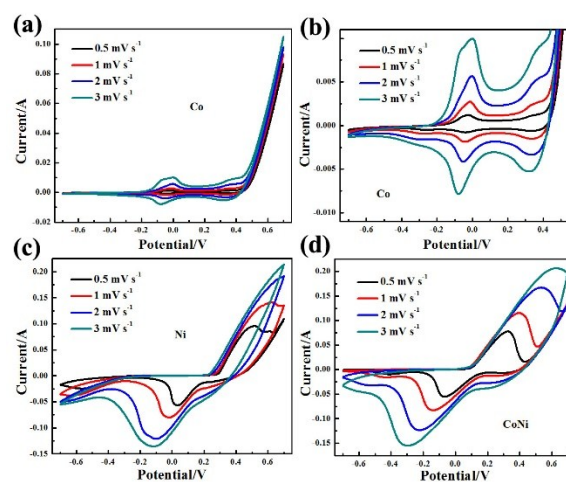**Fig. S6** CV curves of (a) and (b) sample Co, (c) sample Ni and (d) sample CoNi.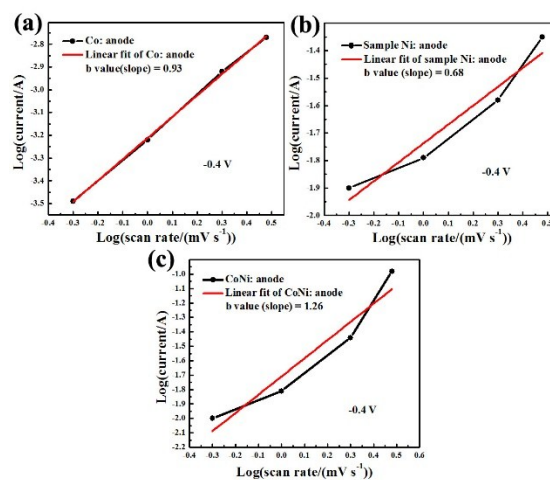**Fig.S7** The linear dependence of log current on log sweep rate (based on Equation (10)) for (a) sample Co, (b) sample Ni and (c) sample CoNi at -0.4 V during the correspondingly anodic CV processes.

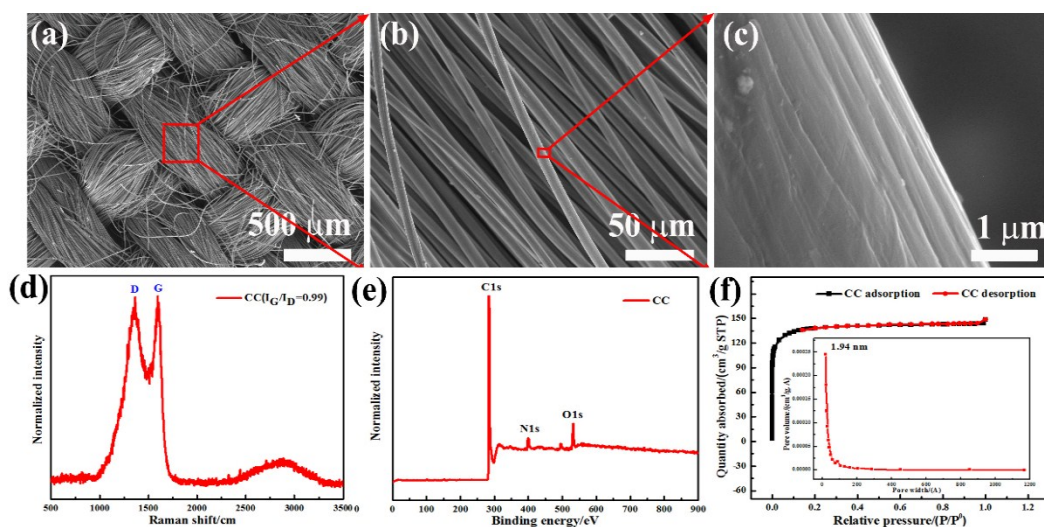

**Fig. S6** (a-c) SEM images of carbon cloth with large surface area (CC). The corresponding (d) Raman spectrum, (e) XPS full pattern and (f) Nitrogen adsorption/desorption isotherm curve, inset: pore size distribution spectrum.

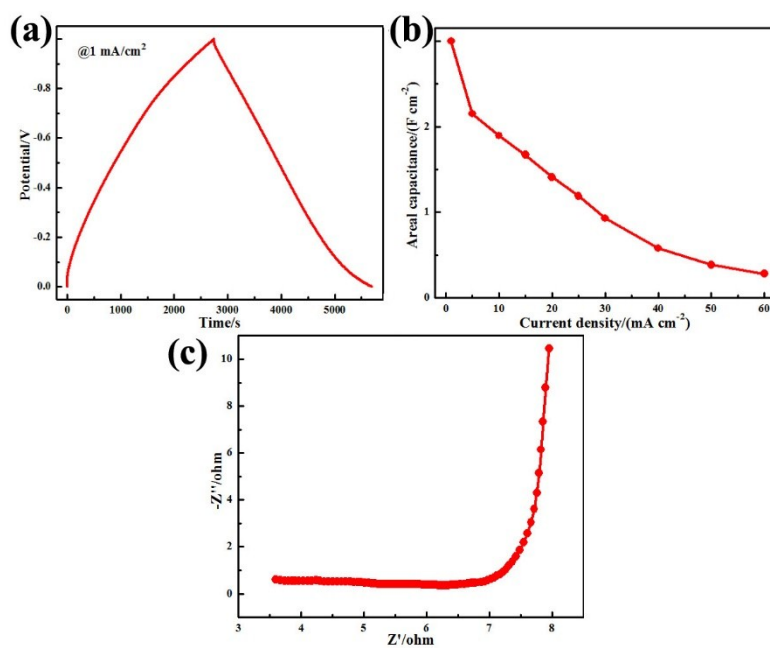

**Fig. S7** (a) GCD curve, (b) rate ability and (c) Nyquist plots of CC as negative electrode.

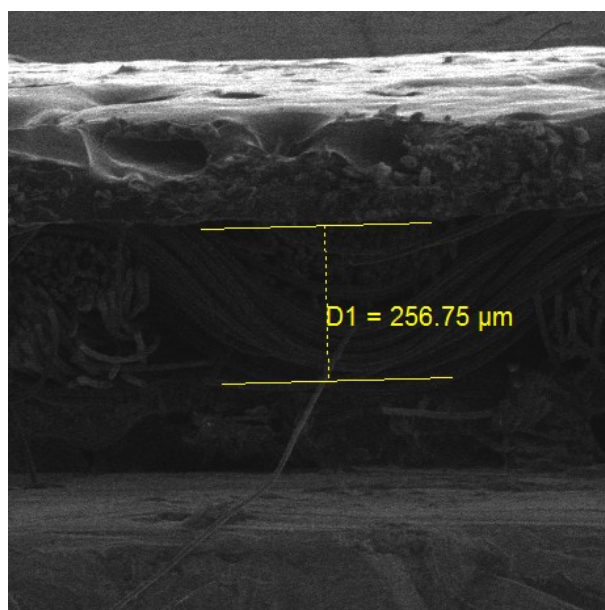

Figure S8. Thickness of CC negative electrode.

**Table S3** Volumetric energy density vs the reported value in literatures

| Supercapacitor                                               | Energy density/(mWh cm <sup>-3</sup> ) | Reference |
|--------------------------------------------------------------|----------------------------------------|-----------|
| CoNi//CC using 6 M KOH                                       | 37.41                                  | This work |
| CoNi//CC using KOH/PVA                                       | 11.98                                  | This work |
| MnO <sub>2</sub> MN//Co <sub>3</sub> O <sub>4</sub>          | 27                                     | 5         |
| MnO <sub>2</sub> /G//NF                                      | 0.27                                   | 6         |
| MnO <sub>2</sub> //Fe <sub>2</sub> O <sub>3</sub>            | 0.41                                   | 7         |
| H-TiO <sub>2</sub> @MnO <sub>2</sub> //H-TiO <sub>2</sub> @C | 0.3                                    | 8         |
| MnO <sub>2</sub> /G//VOS@C                                   | 0.87                                   | 9         |
| MnO <sub>2</sub> @ZnO//rGO                                   | 0.234                                  | 10        |
| ACC//ACC                                                     | 9.4                                    | 11        |

## Reference

- [1] M. Q. Zhao, C. E. Ren, Z. Ling, M. R. Lukatskaya, C. Zhang, K. L. Van Aken, M. W. Barsoum and Y. Gogotsi, *Advanced materials*, 2015, **27**, 339-345.
- [2] Y. Tao, X. Xie, W. Lv, D. M. Tang, D. Kong, Z. Huang, H. Nishihara, T. Ishii, B. Li, D. Golberg, F. Kang, T. Kyotani and Q. H. Yang, *Scientific reports*, 2013, **3**, 2975.
- [3] M. R. Lukatskaya, O. Mashtalir, C. E. Ren, Y. Dall'Agnese, P. Rozier, P. L. Taberna, M. Naguib, P. Simon, M. W. Barsoum and Y. Gogotsi, *Science*, 2013, **341**, 1502-1505.
- [4] M. Acerce, D. Voiry and M. Chhowalla, *Nature nanotechnology*, 2015, **10**, 313-318.
- [5] J. S. Lee, D. H. Shin and J. Jang, *Energy Environ. Sci.*, 2015, **8**, 3030-3039.
- [6] T. Zhai, F. Wang, M. Yu, S. Xie, C. Liang, C. Li, F. Xiao, R. Tang, Q. Wu, X. Lu and Y. Tong, *Nanoscale*, 2013, **5**, 6790-6796.
- [7] X. Lu, Y. Zeng, M. Yu, T. Zhai, C. Liang, S. Xie, M. S. Balogun and Y. Tong, *Advanced materials*, 2014, **26**, 3148-3155.
- [8] X. Lu, M. Yu, G. Wang, T. Zhai, S. Xie, Y. Ling, Y. Tong and Y. Li, *Advanced materials*, 2013,

---

**25**, 267-272.

- [9] T. Zhai, X. Lu, Y. Ling, M. Yu, G. Wang, T. Liu, C. Liang, Y. Tong and Y. Li, *Advanced materials*, 2014, **26**, 5869-5875.
- [10] W. Zilong, Z. Zhu, J. Qiu and S. Yang, *J. Mater. Chem. C*, 2014, **2**, 1331-1336.
- [11] T. Qin, S. Peng, J. Hao, Y. Wen, Z. Wang, X. Wang, D. He, J. Zhang, J. Hou and G. Cao, *Advanced Energy Materials*, 2017, DOI: 10.1002/aenm.201700409, 1700409.
